# Supplementary material for: Effects of abiotic stresses on the expression of chitinase-like genes in Acyrthosiphon pisum
Source: PubMed Central journal article supplement (PMC9727142; doi:10.3389/fphys.2022.1024136), 2022-11-23

Supplementary Table 1. Information of insect chitinase proteins for phylogenetic tree construction

| Species                    | Protein                        | Accession number | Phylogenetic group |            |
|----------------------------|--------------------------------|------------------|--------------------|------------|
| <i>Anopheles gambiae</i>   | <i>AgCht2</i>                  | XP_315650        | Diptera            |            |
|                            | <i>AgCht4</i>                  | XP_315351        | Diptera            |            |
|                            | <i>AgCht5-1</i>                | HQ_456129        | Diptera            |            |
|                            | <i>AgCht5-2</i>                | HQ_456130        | Diptera            |            |
|                            | <i>AgCht5-3</i>                | HQ_456131        | Diptera            |            |
|                            | <i>AgCht5-4</i>                | HQ_456132        | Diptera            |            |
|                            | <i>AgCht5-5</i>                | HQ_456133        | Diptera            |            |
|                            | <i>AgCht7</i>                  | XP_308858        | Diptera            |            |
|                            | <i>AgCht8</i>                  | XP_316448        | Diptera            |            |
|                            | <i>AgCht10</i>                 | XP_001238192     | Diptera            |            |
|                            | <i>AgCht11</i>                 | XP_310662        | Diptera            |            |
|                            | <i>AgIDGF2</i>                 | XP_001237925     | Diptera            |            |
|                            | <i>AgIDGF4</i>                 | XP_317398        | Diptera            |            |
|                            | <i>Drosophila melanogaster</i> | <i>DmCht2</i>    | NP_477298          | Diptera    |
| <i>DmCht4</i>              |                                | NP_524962        | Diptera            |            |
| <i>DmCht5</i>              |                                | NP_650314        | Diptera            |            |
| <i>DmCht7</i>              |                                | NP_647768        | Diptera            |            |
| <i>DmCht8</i>              |                                | NP_611542        | Diptera            |            |
| <i>DmCht9</i>              |                                | NP_611543        | Diptera            |            |
| <i>DmCht10</i>             |                                | EAA46011         | Diptera            |            |
| <i>DmCht11</i>             |                                | NP_572361        | Diptera            |            |
| <i>DmIDGF1</i>             |                                | NP_477258        | Diptera            |            |
| <i>DmIDGF2</i>             |                                | NP_477257        | Diptera            |            |
| <i>DmIDGF3</i>             |                                | NP_723967        | Diptera            |            |
| <i>DmIDGF4</i>             |                                | NP_727374        | Diptera            |            |
| <i>DmIDGF5</i>             |                                | NP_611321        | Diptera            |            |
| <i>DmIDGF6</i>             |                                | NP_477081        | Diptera            |            |
| <i>Tribolium castaneum</i> |                                | <i>TcCht4</i>    | NP_001073567       | Coleoptera |
|                            |                                | <i>TcCht5</i>    | NP_001034524       | Coleoptera |
|                            | <i>TcCht6</i>                  | XP_967813        | Coleoptera         |            |
|                            | <i>TcCht7</i>                  | NP_001036035     | Coleoptera         |            |
|                            | <i>TcCht8</i>                  | NP_001038094     | Coleoptera         |            |

---

|                               |                  |              |             |
|-------------------------------|------------------|--------------|-------------|
|                               | <i>TcCht9</i>    | NP_001038096 | Coleoptera  |
|                               | <i>TcCht10</i>   | NP_001036067 | Coleoptera  |
|                               | <i>TcIDGF2</i>   | NP_001038092 | Coleoptera  |
|                               | <i>TcIDGF4</i>   | NP_001038091 | Coleoptera  |
|                               | <i>TcENGase</i>  | XP_969648.1  | Coleoptera  |
| <i>Bombyx mori</i>            | <i>BmCht1-1</i>  | XP_004931749 | Lepidoptera |
|                               | <i>BmCht2</i>    | XP_004933352 | Lepidoptera |
|                               | <i>BmCht5</i>    | AAB47538     | Lepidoptera |
|                               | <i>BmIDGF</i>    | NP_001036847 | Lepidoptera |
| <i>Phenacoccus solenopsis</i> | <i>PsCht3-3</i>  | MH686272     | Hemiptera   |
|                               | <i>PsCht5</i>    | MH686266     | Hemiptera   |
|                               | <i>PsCht10</i>   | MH686270     | Hemiptera   |
|                               | <i>PsIDGF</i>    | MH686273     | Hemiptera   |
| <i>Aphis gossypii</i>         | <i>AgoCht3-2</i> | KAF0755855   | Hemiptera   |
| <i>Apis mellifera</i>         | <i>AmCht10</i>   | XP_026299805 | Hymenoptera |
|                               | <i>AmENGase</i>  | XP_001121069 | Hymenoptera |
| <i>Bactrocera dorsalis</i>    | <i>BdCht1</i>    | MF926351     | Diptera     |
|                               | <i>BdCht2</i>    | KF289944     | Diptera     |
|                               | <i>BdCht5</i>    | KY681041     | Diptera     |
|                               | <i>BdCht7</i>    | KY681042     | Diptera     |
|                               | <i>BdCht8</i>    | KY426795     | Diptera     |
|                               | <i>BdCht10</i>   | MK518061     | Diptera     |
|                               | <i>BdCht11</i>   | KY426794     | Diptera     |
|                               | <i>BdIDGF1</i>   | KY681043     | Diptera     |
|                               | <i>BdIDGF2</i>   | KY681044     | Diptera     |
|                               | <i>BdIDGF3</i>   | KY681045     | Diptera     |
|                               | <i>BdIDGF4</i>   | KY681046     | Diptera     |
|                               | <i>BdIDGF6</i>   | KY426796     | Diptera     |
| <i>Nilaparvata lugens</i>     | <i>NICh5</i>     | KM217113     | Hemiptera   |
|                               | <i>NICh6</i>     | KM217114     | Hemiptera   |
|                               | <i>NICh7</i>     | KM217115     | Hemiptera   |
|                               | <i>NICh10</i>    | KM217118     | Hemiptera   |
|                               | <i>NIIDGF</i>    | KM217119     | Hemiptera   |
| <i>Acyrtosiphon pisum</i>     | <i>ApCht3</i>    | XM_001952683 | Hemiptera   |

---

|                 |              |           |
|-----------------|--------------|-----------|
| <i>ApCht7</i>   | XM_001950345 | Hemiptera |
| <i>ApCht10</i>  | XM_001943003 | Hemiptera |
| <i>ApIDGF</i>   | NM_001168671 | Hemiptera |
| <i>ApENGase</i> | XM_001949910 | Hemiptera |

Supplementary Table 2. Primers for qPCR the genes of chitinase in *Acyrtosiphon pisum*

| Genes                         | Primers                         | Nucleotide sequence (5'-3') |
|-------------------------------|---------------------------------|-----------------------------|
| <i>ApIDGF</i>                 | <i>ApIDGF-F</i>                 | GGGTATCTCTACGTACGGCC        |
|                               | <i>ApIDGF-R</i>                 | AAGGGTGAGAGATGTGGTGG        |
| <i>ApCht3</i>                 | <i>ApCht3-F</i>                 | CGGCAAGGACGGTTTTGTAA        |
|                               | <i>ApCht3-R</i>                 | GAAAATACCATGGCGCCTCC        |
| <i>ApCht7</i>                 | <i>ApCht7-F</i>                 | TACCTGAAGACATCGACCCG        |
|                               | <i>ApCht7-R</i>                 | AACTTTTGTGTGCCGAACGA        |
| <i>ApCht10</i>                | <i>ApCht10-F</i>                | ACTGGTCCAAGATCCACTGG        |
|                               | <i>ApCht10-R</i>                | GATACGTTTCGCAGCCACAT        |
| <i>ApENGase</i>               | <i>ApENGase-F</i>               | ATGTTGACGGTGAAGCAGTT        |
|                               | <i>ApENGase-R</i>               | TCCCTGAATGCCAAACTCCA        |
| <i>EF1<math>\alpha</math></i> | <i>EF1<math>\alpha</math>-F</i> | CTGTGCTTATTGTCGCTGCT        |
|                               | <i>EF1<math>\alpha</math>-R</i> | TCGCTGTATGGTGGTTTCAGT       |
| <i>RPS20</i>                  | <i>RPS20-F</i>                  | AAGTGTGTGCTCCGAGATGA        |
|                               | <i>RPS20-R</i>                  | CAGCAATGACACCGGGTTC         |

Supplementary Table 3. Lengths of each exon and intron of Chitinase gene in *Acyrtosiphon pisum*

| 基因             | 类别        | 从 5'到 3'长度                                                                                                                                                                            |
|----------------|-----------|---------------------------------------------------------------------------------------------------------------------------------------------------------------------------------------|
| Gene           | Structure | From 5'to 3'Length (5'-3')                                                                                                                                                            |
| <i>ApIDGF</i>  | Exon      | 553, 400, 171, 133, 269, 345.                                                                                                                                                         |
|                | Intron    | 3381, 1134, 223, 644,1701.                                                                                                                                                            |
| <i>ApCht3</i>  | Exon      | 548, 215, 224, 136, 271, 166, 103, 115.                                                                                                                                               |
|                | Intron    | 61, 65, 695, 449, 180, 59, 489.                                                                                                                                                       |
| <i>ApCht7</i>  | Exon      | 291, 90, 232, 237, 179, 123, 309, 235, 190, 217, 295, 147, 185, 122, 201, 908.                                                                                                        |
|                | Intron    | 16014, 8517, 1564, 922, 85, 75, 365, 61, 67, 85, 62, 67, 59, 89, 569.                                                                                                                 |
| <i>ApCht10</i> | Exon      | 695, 282, 193, 182, 142, 135, 211, 133, 318, 135, 125, 185,142, 135, 211, 179, 363, 163, 204, 190, 452, 222, 112, 189, 227, 141, 129, 182, 53, 216, 305, 277, 188, 164, 91, 162, 125. |
|                | Intron    | 57, 642, 91, 365, 91, 137, 95, 62, 883, 770, 65, 76, 63, 84, 64, 63,                                                                                                                  |

61, 85, 80, 65, 568, 90, 377, 68, 63, 57, 66, 64, 71, 57, 72, 59, 72,  
67, 324, 3749.

|                 |        |            |
|-----------------|--------|------------|
| <i>ApENGase</i> | Exon   | 1927, 224. |
|                 | Intron | 442.       |

Supplementary Figure 1. Conserved regions in the glycoside hydrolase family 18 (GH18) domain of 5 *A. pisum*. Amino acid sequences of the catalytic domains of GH18 family enzymes were aligned using CLUSTALX software. Two and four catalytic domains of *ApCht7* and *ApCht10* were named as *ApCht7-1/2* and *ApCht10-1/2/3/4*, respectively. Boxed regions are the four conserved motifs represented by the sequences KxxxxxGGW (Mofit I), FDGxLDLWEYP (Mofit II), MxYDxxG (Mofit III) and GxxxWxxDxDD (Mofit IV).

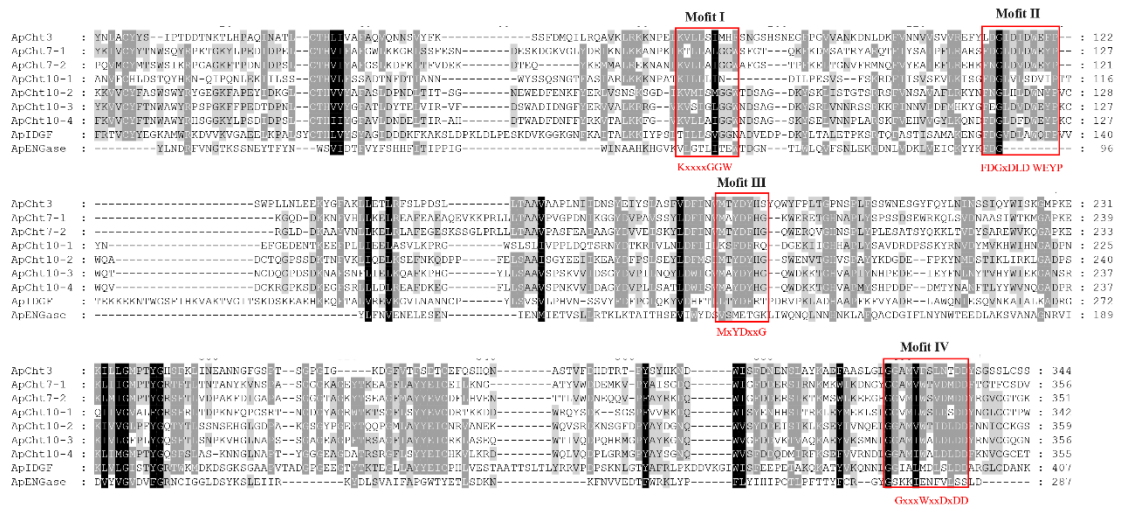

Supplementary Figure 2. Expression of the chitinase genes in response to temperature stress. Different lowercase letters are statistically different under same temperature stress in *A. pisum* ( $p < 0.05$ ).

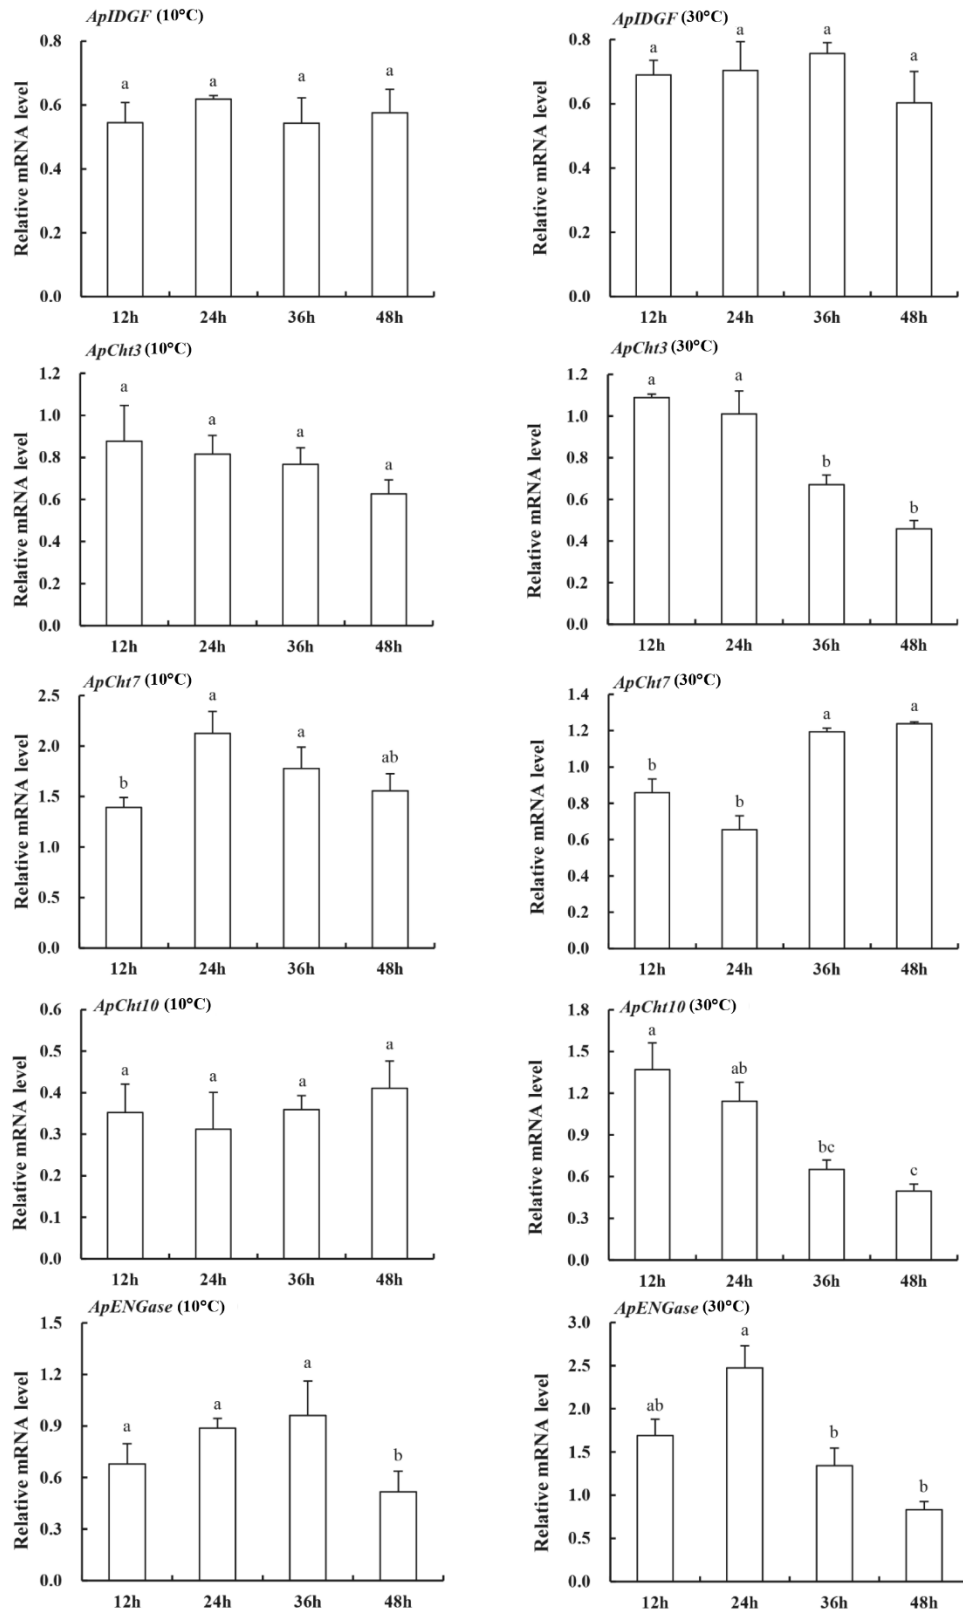

Supplementary Figure 3. Expression of the chitinase genes in response to insecticide stress. Different lowercase letters are statistically different under insecticide stress in *A. pisum* ( $p < 0.05$ ).

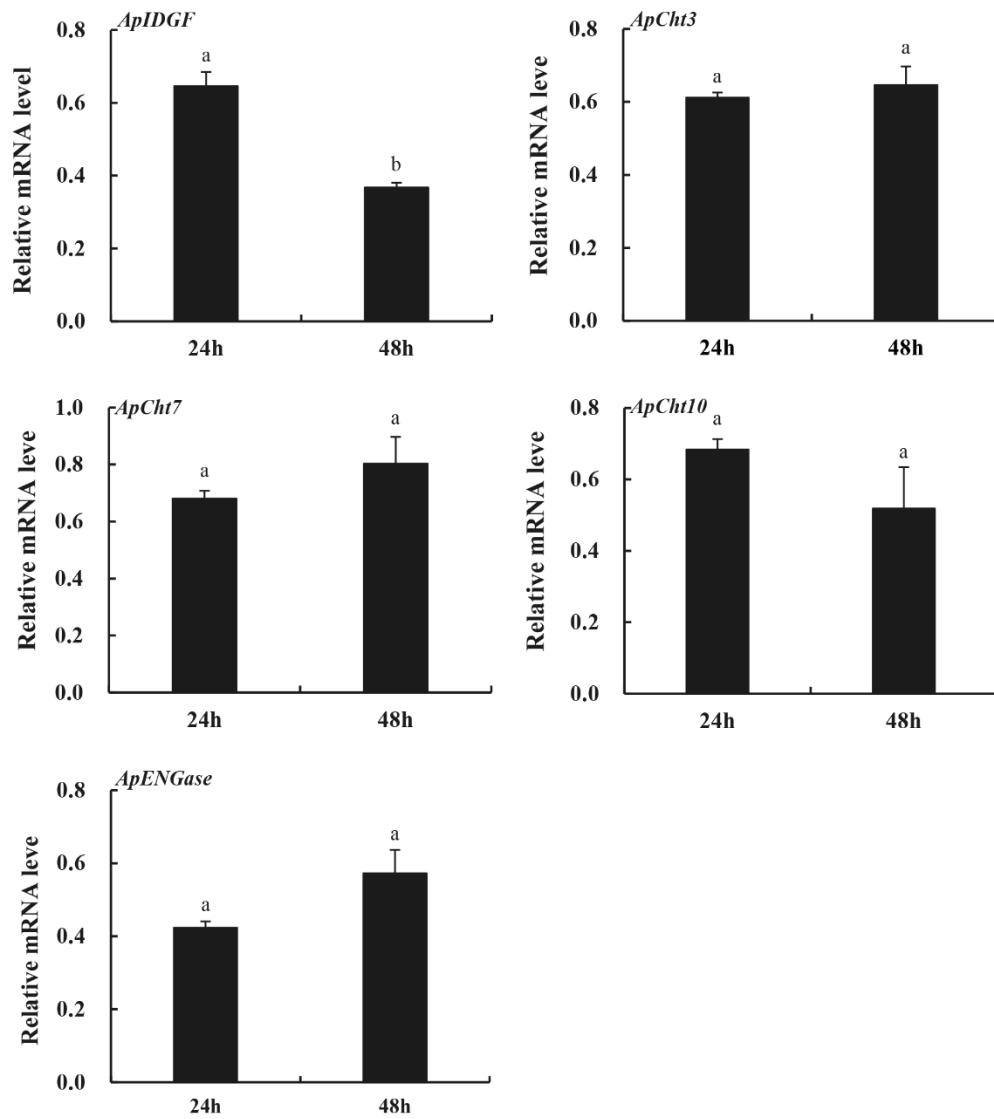

Supplementary Figure 4. Expression of the chitinase genes in response to 20E treatment. Different lowercase letters are statistically different under 20E stress in *A. pisum* ( $p < 0.05$ ).

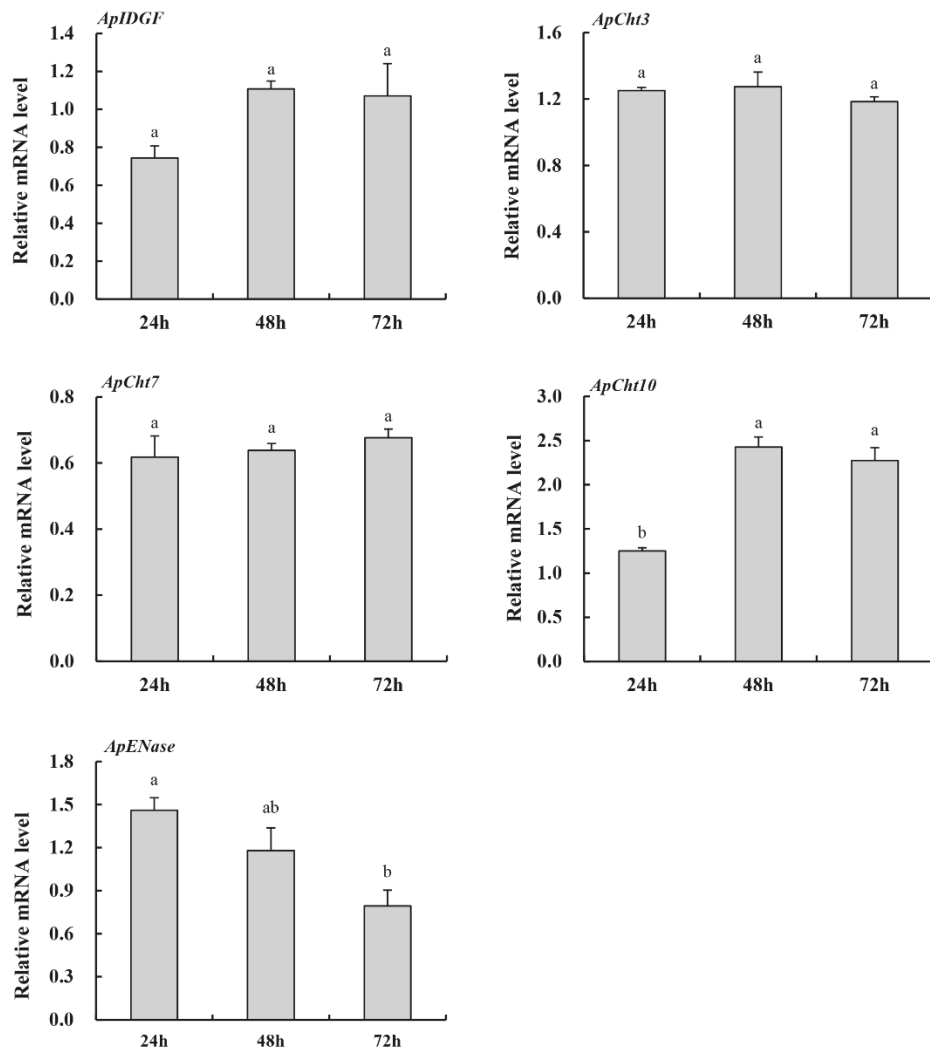

Supplement: DataSheet1.pdf [file DataSheet1.pdf]
